# Supplementary material
Source: PubMed Central journal article supplement (PMC4403574)
Supplement: tpp_14.170-suppl-01.pdf [file tpp_14.170-suppl-01.pdf]

# Panel Management Questionnaires

## STAFF PANEL MANAGEMENT QUESTIONNAIRE

**Immunizations:** How much do you agree or disagree with each of the following statements?

Please indicate your degree of agreement from 1 = Strongly disagree to 10 = Strongly agree.

|                                                                                                                                                                                                                                                                             | Strongly disagree |   |   |   |   |   |   |   |   | Strongly agree |
|-----------------------------------------------------------------------------------------------------------------------------------------------------------------------------------------------------------------------------------------------------------------------------|-------------------|---|---|---|---|---|---|---|---|----------------|
| I am responsible along with the patient's clinician to make sure that patients at our clinic are up to date on immunizations such as flu shots, Tdap/DtaP, and pneumococcal vaccine.                                                                                        | 1                 | 2 | 3 | 4 | 5 | 6 | 7 | 8 | 9 | 10             |
| I am confident that I can answer most questions my patients have about immunizations such as flu shots, Tdap/DtaP, and pneumococcal vaccine.                                                                                                                                | 1                 | 2 | 3 | 4 | 5 | 6 | 7 | 8 | 9 | 10             |
| During patient intake, I know how to identify patients who are not up to date on immunizations such as flu shots, Tdap/DtaP, and pneumococcal vaccine.                                                                                                                      | 1                 | 2 | 3 | 4 | 5 | 6 | 7 | 8 | 9 | 10             |
| During patient intake, if I determine that a patient is due for a flu shot, Tdap, or DtaP, I can administer the appropriate immunization to the patient or place a pending order without waiting for the clinician to specifically order the immunization for that patient. | 1                 | 2 | 3 | 4 | 5 | 6 | 7 | 8 | 9 | 10             |

**Cancer screenings:** How much do you agree or disagree with each of the following statements?

Please indicate your degree of agreement from 1 = Strongly disagree to 10 = Strongly agree.

|                                                                                                                                                                                                                                                     | Strongly disagree |   |   |   |   |   |   |   |   | Strongly agree |
|-----------------------------------------------------------------------------------------------------------------------------------------------------------------------------------------------------------------------------------------------------|-------------------|---|---|---|---|---|---|---|---|----------------|
| I am responsible along with the patient's clinician to make sure that patients at our clinic are up to date on cancer screenings such as mammograms, Pap tests, and fecal occult blood tests or colonoscopy.                                        | 1                 | 2 | 3 | 4 | 5 | 6 | 7 | 8 | 9 | 10             |
| I am confident that I can answer most questions my patients have about cancer screenings such as mammograms, Pap tests, and fecal occult blood tests or colonoscopy.                                                                                | 1                 | 2 | 3 | 4 | 5 | 6 | 7 | 8 | 9 | 10             |
| During patient intake, I know how to identify patients who are not up to date on their cancer screenings such as mammograms, Pap tests, and fecal occult blood tests or colonoscopy.                                                                | 1                 | 2 | 3 | 4 | 5 | 6 | 7 | 8 | 9 | 10             |
| During patient intake, if I determine that a patient is due for colon cancer screening, I can dispense FOBTs or FIT tests to the patient or place pending orders without waiting for the clinician to specifically order the test for that patient. | 1                 | 2 | 3 | 4 | 5 | 6 | 7 | 8 | 9 | 10             |

**Diabetes care:** How much do you agree or disagree with each of the following statements?

Please indicate your degree of agreement from 1 = Strongly disagree to 10 = Strongly agree.

|                                                                                                                                                                                                                                                          | Strongly disagree |   |   |   |   |   |   |   |   | Strongly agree |
|----------------------------------------------------------------------------------------------------------------------------------------------------------------------------------------------------------------------------------------------------------|-------------------|---|---|---|---|---|---|---|---|----------------|
| I am responsible along with the patient's clinician to make sure that diabetic patients at our clinic are up to date on their HbA <sub>1c</sub> and LDL lab tests.                                                                                       | 1                 | 2 | 3 | 4 | 5 | 6 | 7 | 8 | 9 | 10             |
| I am confident that I can answer most questions my patients have about HbA <sub>1c</sub> and LDL lab tests for diabetes care.                                                                                                                            | 1                 | 2 | 3 | 4 | 5 | 6 | 7 | 8 | 9 | 10             |
| During patient intake, I know how to identify diabetic patients who are not up to date on their HbA <sub>1c</sub> and LDL lab tests.                                                                                                                     | 1                 | 2 | 3 | 4 | 5 | 6 | 7 | 8 | 9 | 10             |
| During patient intake, if I determine that a diabetic patient is due for an HbA <sub>1c</sub> or LDL lab test, I can order or place pending orders for these tests without waiting for the clinician to specifically order these tests for that patient. | 1                 | 2 | 3 | 4 | 5 | 6 | 7 | 8 | 9 | 10             |

FIT = fecal immunochemical test; flu shot = influenza injectable vaccine; FOBT = fecal occult blood test; HbA<sub>1c</sub> = hemoglobin A<sub>1c</sub>; lab = laboratory; LDL = low-density-lipoprotein cholesterol; Pap = Papanicolaou; Tdap/DtaP = tetanus, diphtheria, and acellular pertussis/diphtheria, tetanus toxoids, and acellular pertussis.

**CLINICIAN PANEL MANAGEMENT QUESTIONNAIRE**

**Immunizations:** How much do you agree or disagree with each of the following statements?

Please indicate your degree of agreement from 1 = Strongly disagree to 10 = Strongly agree.

|                                                                                                                                                                                                                                                                   | Strongly disagree |   |   |   |   |   |   |   |   | Strongly agree |
|-------------------------------------------------------------------------------------------------------------------------------------------------------------------------------------------------------------------------------------------------------------------|-------------------|---|---|---|---|---|---|---|---|----------------|
| I am confident that the medical assistants at my clinic can identify patients who are not up to date on immunizations such as flu shots, Tdap/DtaP, and pneumococcal vaccine.                                                                                     | 1                 | 2 | 3 | 4 | 5 | 6 | 7 | 8 | 9 | 10             |
| I am confident that medical assistants at my clinic can answer most questions my patients have about immunizations such as flu shots, Tdap/DtaP, and pneumococcal vaccine.                                                                                        | 1                 | 2 | 3 | 4 | 5 | 6 | 7 | 8 | 9 | 10             |
| I do <i>not</i> think that a medical assistant who identifies a patient who needs an immunization, such as a flu shot, Tdap/DtaP, or pneumococcal vaccine, should administer the injection or place a pending order before I specifically order the immunization. | 1                 | 2 | 3 | 4 | 5 | 6 | 7 | 8 | 9 | 10             |
| If I do not order an immunization, such as a flu shot, Tdap/DtaP, or pneumococcal vaccine, I can't be sure it will be done.                                                                                                                                       | 1                 | 2 | 3 | 4 | 5 | 6 | 7 | 8 | 9 | 10             |

**Cancer screenings:** How much do you agree or disagree with each of the following statements?

Please indicate your degree of agreement from 1 = Strongly disagree to 10 = Strongly agree.

|                                                                                                                                                                                                                                                                  | Strongly disagree |   |   |   |   |   |   |   |   | Strongly agree |
|------------------------------------------------------------------------------------------------------------------------------------------------------------------------------------------------------------------------------------------------------------------|-------------------|---|---|---|---|---|---|---|---|----------------|
| I am confident that the medical assistants at my clinic can identify patients who are not up to date on cancer screenings such as mammograms, Pap tests, and fecal occult blood tests or colonoscopy.                                                            | 1                 | 2 | 3 | 4 | 5 | 6 | 7 | 8 | 9 | 10             |
| I am confident that medical assistants at my clinic can answer most questions my patients have about cancer screenings such as mammograms, Pap tests, and fecal occult blood tests or colonoscopy.                                                               | 1                 | 2 | 3 | 4 | 5 | 6 | 7 | 8 | 9 | 10             |
| I do <i>not</i> think that a medical assistant who identifies a patient who needs a cancer screening (such as mammograms, Pap tests, and fecal occult blood tests or colonoscopy) should order the test or place a pending order before I specifically order it. | 1                 | 2 | 3 | 4 | 5 | 6 | 7 | 8 | 9 | 10             |
| If I do not order a cancer screening (such as mammograms, Pap tests, and fecal occult blood tests or colonoscopy), I can't be sure it will be done.                                                                                                              | 1                 | 2 | 3 | 4 | 5 | 6 | 7 | 8 | 9 | 10             |

**Diabetes care:** How much do you agree or disagree with each of the following statements?

Please indicate your degree of agreement from 1 = Strongly disagree to 10 = Strongly agree.

|                                                                                                                                                                                                                 | Strongly disagree |   |   |   |   |   |   |   |   | Strongly agree |
|-----------------------------------------------------------------------------------------------------------------------------------------------------------------------------------------------------------------|-------------------|---|---|---|---|---|---|---|---|----------------|
| I am confident that the medical assistants at my clinic can identify diabetic patients who are not up to date on lab tests such as HbA <sub>1c</sub> and LDL.                                                   | 1                 | 2 | 3 | 4 | 5 | 6 | 7 | 8 | 9 | 10             |
| I am confident that medical assistants at my clinic can answer most questions my patients have about lab tests such as HbA <sub>1c</sub> or LDL for diabetes care.                                              | 1                 | 2 | 3 | 4 | 5 | 6 | 7 | 8 | 9 | 10             |
| I do <i>not</i> think that a medical assistant who identifies a diabetic patient who needs a lab test such as HbA <sub>1c</sub> or LDL, should order the test or pend the order before I specifically order it. | 1                 | 2 | 3 | 4 | 5 | 6 | 7 | 8 | 9 | 10             |
| If I do not order lab tests such as HbA <sub>1c</sub> or LDL for my diabetic patients, I can't be sure it will be done.                                                                                         | 1                 | 2 | 3 | 4 | 5 | 6 | 7 | 8 | 9 | 10             |

Flu shot = influenza injectable vaccine; HbA<sub>1c</sub> = hemoglobin A<sub>1c</sub>; lab = laboratory; LDL = low-density-lipoprotein cholesterol; Pap = Papanicolaou; Tdap/DtaP = tetanus, diphtheria, and acellular pertussis/diphtheria, tetanus toxoids, and acellular pertussis.
